# Supplementary material for: Dietary Sodium Intake and Risk of Cardiovascular Disease: A Systematic Review and Dose-Response Meta-Analysis
Source: PubMed Central journal article supplement (PMC7601012; doi:10.3390/nu12102934), 2020-09-25
Supplement: nutrients-12-02934-s001.pdf [file nutrients-12-02934-s001.pdf]

### Supplemental data

Wang YJ, Yeh TL, Shih MC, et al. Dietary Sodium Intake and The Risk of Cardiovascular Disease : A Systematic Review and Dose-Response Meta-analysis

**Supplementary S1.** PRISMA checklist Study

**Supplementary S2.** Protocol and Search Strategies

**Figure S1.** Forest plot for the coefficients of dietary sodium intake and risk of total cardiovascular disease in 28 studies.

**Figure S2.** Sensitivity analyses of dietary sodium intake and risk of cardiovascular disease by omitting each study.

**Figure S3.** Funnel plot of cardiovascular disease for coefficients of dietary sodium intake in 28 studies of  $\beta$ -coefficients type.

**Figure S4.** Funnel plot of cardiovascular disease for highest versus lowest categories of dietary sodium intake in 24 studies of highest versus lowest type .

**Table S1.** Characteristics of the studies included in the systematic review.

**Table S2.** Newcastle–Ottawa scale for assessment of quality of included cohort studies.

**Supplemental References.** References for Table S1 and Table S2.

**Supplementary S1. PRISMA checklist.**

| Section/topic             | # | Checklist item                                                                                                                                                                                                                                                                                              | Reported on page # |
|---------------------------|---|-------------------------------------------------------------------------------------------------------------------------------------------------------------------------------------------------------------------------------------------------------------------------------------------------------------|--------------------|
| <b>TITLE</b>              |   |                                                                                                                                                                                                                                                                                                             |                    |
| Title                     | 1 | Identify the report as a systematic review, meta-analysis, or both.                                                                                                                                                                                                                                         | 1                  |
| <b>ABSTRACT</b>           |   |                                                                                                                                                                                                                                                                                                             |                    |
| Structured summary        | 2 | Provide a structured summary including, as applicable: background; objectives; data sources; study eligibility criteria, participants, and interventions; study appraisal and synthesis methods; results; limitations; conclusions and implications of key findings; systematic review registration number. | 1                  |
| <b>INTRODUCTION</b>       |   |                                                                                                                                                                                                                                                                                                             |                    |
| Rationale                 | 3 | Describe the rationale for the review in the context of what is already known.                                                                                                                                                                                                                              | 1-2                |
| Objectives                | 4 | Provide an explicit statement of questions being addressed with reference to participants, interventions, comparisons, outcomes, and study design (PICOS).                                                                                                                                                  | 2                  |
| <b>METHODS</b>            |   |                                                                                                                                                                                                                                                                                                             |                    |
| Protocol and registration | 5 | Indicate if a review protocol exists, if and where it can be accessed (e.g., Web address), and, if available, provide registration information including registration number.                                                                                                                               | 2                  |
| Eligibility criteria      | 6 | Specify study characteristics (e.g., PICOS, length of follow-up) and report characteristics (e.g., years considered, language, publication status) used as criteria for eligibility, giving rationale.                                                                                                      | 2                  |
| Information sources       | 7 | Describe all information sources (e.g., databases with dates of coverage, contact with study authors to identify additional studies) in the search and date last searched.                                                                                                                                  | 2                  |
| Search                    | 8 | Present full electronic search strategy for at least one database, including any limits used, such that it could be repeated.                                                                                                                                                                               | 2-3                |
| Study selection           | 9 | State the process for selecting studies (i.e., screening, eligibility, included in systematic review,                                                                                                                                                                                                       | 2-3                |

|                                    |    |                                                                                                                                                                                                                        |     |
|------------------------------------|----|------------------------------------------------------------------------------------------------------------------------------------------------------------------------------------------------------------------------|-----|
|                                    |    | and, if applicable, included in the meta-analysis).                                                                                                                                                                    |     |
| Data collection process            | 10 | Describe method of data extraction from reports (e.g., piloted forms, independently, in duplicate) and any processes for obtaining and confirming data from investigators.                                             | 3   |
| Data items                         | 11 | List and define all variables for which data were sought (e.g., PICOS, funding sources) and any assumptions and simplifications made.                                                                                  | 3   |
| Risk of bias in individual studies | 12 | Describe methods used for assessing risk of bias of individual studies (including specification of whether this was done at the study or outcome level), and how this information is to be used in any data synthesis. | 3   |
| Summary measures                   | 13 | State the principal summary measures (e.g., risk ratio, difference in means).                                                                                                                                          | 3   |
| Synthesis of results               | 14 | Describe the methods of handling data and combining results of studies, if done, including measures of consistency (e.g., I <sup>2</sup> ) for each meta-analysis.                                                     | 3-4 |

| Section/topic               | #  | Checklist item                                                                                                                                                  | Reported on page # |
|-----------------------------|----|-----------------------------------------------------------------------------------------------------------------------------------------------------------------|--------------------|
| Risk of bias across studies | 15 | Specify any assessment of risk of bias that may affect the cumulative evidence (e.g., publication bias, selective reporting within studies).                    | 3-4                |
| Additional analyses         | 16 | Describe methods of additional analyses (e.g., sensitivity or subgroup analyses, meta-regression), if done, indicating which were pre-specified.                | 3-4                |
| <b>RESULTS</b>              |    |                                                                                                                                                                 |                    |
| Study selection             | 17 | Give numbers of studies screened, assessed for eligibility, and included in the review, with reasons for exclusions at each stage, ideally with a flow diagram. | 4-5, Figure 1      |
| Study characteristics       | 18 | For each study, present characteristics for which data were extracted (e.g., study size, PICOS, follow-up period) and provide the citations.                    | 4,                 |
| Risk of bias within         | 19 | Present data on risk of bias of each study and, if available, any outcome level assessment                                                                      | 4, Table S2        |

|                               |    |                                                                                                                                                                                                          |                                   |
|-------------------------------|----|----------------------------------------------------------------------------------------------------------------------------------------------------------------------------------------------------------|-----------------------------------|
| studies                       |    | (see item 12).                                                                                                                                                                                           |                                   |
| Results of individual studies | 20 | For all outcomes considered (benefits or harms), present, for each study: (a) simple summary data for each intervention group (b) effect estimates and confidence intervals, ideally with a forest plot. | 4-8, Table S1, Figure 2, Figure 3 |
| Synthesis of results          | 21 | Present results of each meta-analysis done, including confidence intervals and measures of consistency.                                                                                                  | 4                                 |
| Risk of bias across studies   | 22 | Present results of any assessment of risk of bias across studies (see Item 15).                                                                                                                          | 4                                 |
| Additional analysis           | 23 | Give results of additional analyses, if done (e.g., sensitivity or subgroup analyses, meta-regression [see Item 16]).                                                                                    | 7-8, Table 1, Table 2             |
| DISCUSSION                    |    |                                                                                                                                                                                                          |                                   |
| Summary of evidence           | 24 | Summarize the main findings including the strength of evidence for each main outcome; consider their relevance to key groups (e.g., healthcare providers, users, and policy makers).                     | 8                                 |
| Limitations                   | 25 | Discuss limitations at study and outcome level (e.g., risk of bias), and at review-level (e.g., incomplete retrieval of identified research, reporting bias).                                            | 9-10                              |
| Conclusions                   | 26 | Provide a general interpretation of the results in the context of other evidence, and implications for future research.                                                                                  | 10                                |
| FUNDING                       |    |                                                                                                                                                                                                          |                                   |
| Funding                       | 27 | Describe sources of funding for the systematic review and other support (e.g., supply of data); role of funders for the systematic review.                                                               | 8                                 |

## Supplementary S2. Search Strategies

### Search Strategies

We will search the following electronic databases:

1. PubMed
2. Embase

There will be a restriction on language of publication in English.

We will search additional studies in the reference lists of all identified publications, including relevant meta-analyses and systematic reviews.

#### 1. PubMed:

Search using the NCBI interface from the earliest available date of indexing through August 17, 2020

("Cardiovascular Diseases"[Mesh]) AND "Sodium, Dietary"[Mesh] OR "Sodium Chloride, Dietary"[Mesh] AND "Cohort Studies"[Mesh] OR "urinary sodium excretion"AND"humans"

#### 2. Embase:

Search using the Elsevier interface from the earliest available date of indexing through August 17, 2020

('sodium intake'/exp OR 'dietary sodium' OR 'intake, sodium' OR 'natrium intake' OR 'sodium intake' OR 'sodium, dietary' OR 'sodium urine level'/exp OR 'diuresis, saline' OR 'diuresis, sodium' OR 'renal sodium excretion' OR 'sodium diuresis' OR 'sodium excretion, urinary' OR 'sodium loss' OR 'sodium urine level' OR 'urinary salt' OR 'urinary sodium' OR 'urinary sodium excretion' OR 'urine salt' OR 'urine sodium' OR 'salt intake'/exp OR 'dietary salt' OR 'dietary sodium chloride' OR 'intake, salt' OR 'salt intake' OR 'sodium chloride intake' OR 'sodium chloride, dietary') AND ('cardiovascular disease'/exp OR 'angiocardopathy' OR 'angiocardiovascular disease' OR 'cardiovascular complication' OR 'cardiovascular disease' OR 'cardiovascular diseases' OR 'cardiovascular disorder' OR 'cardiovascular disturbance' OR 'cardiovascular lesion' OR 'cardiovascular syndrome' OR 'cardiovascular vegetative disorder' OR 'complication, cardiovascular' OR 'disease, cardiovascular' OR 'major adverse cardiovascular event') AND ('cohort analysis'/exp OR 'analysis, cohort' OR 'cohort analysis' OR 'cohort fertility' OR 'cohort life cycle' OR 'cohort studies' OR 'cohort study' OR 'fertility, cohort') AND [humans]

Figure S1. Forest plot for the coefficients of dietary sodium intake and risk of total cardiovascular disease<sup>a</sup> in 28 studies.

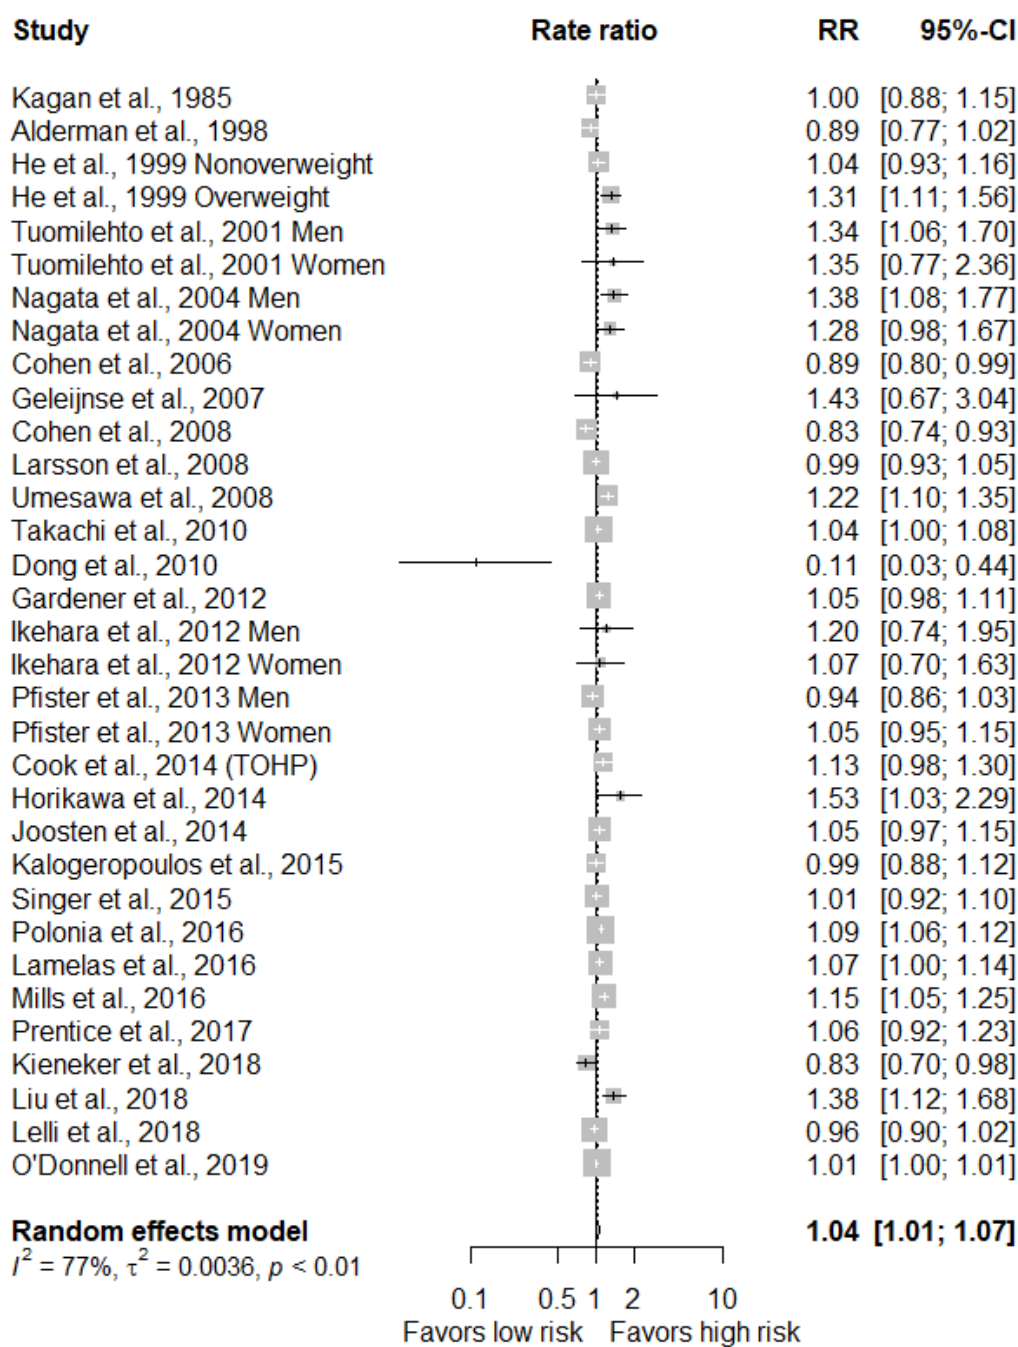

a: Total cardiovascular disease: The total cardiovascular disease included total CVD, CVD mortality, stroke, coronary heart disease, myocardial infarction and heart failure.

Figure S2. Sensitivity analyses of dietary sodium intake and risk of total cardiovascular disease<sup>a</sup> by omitting each study.

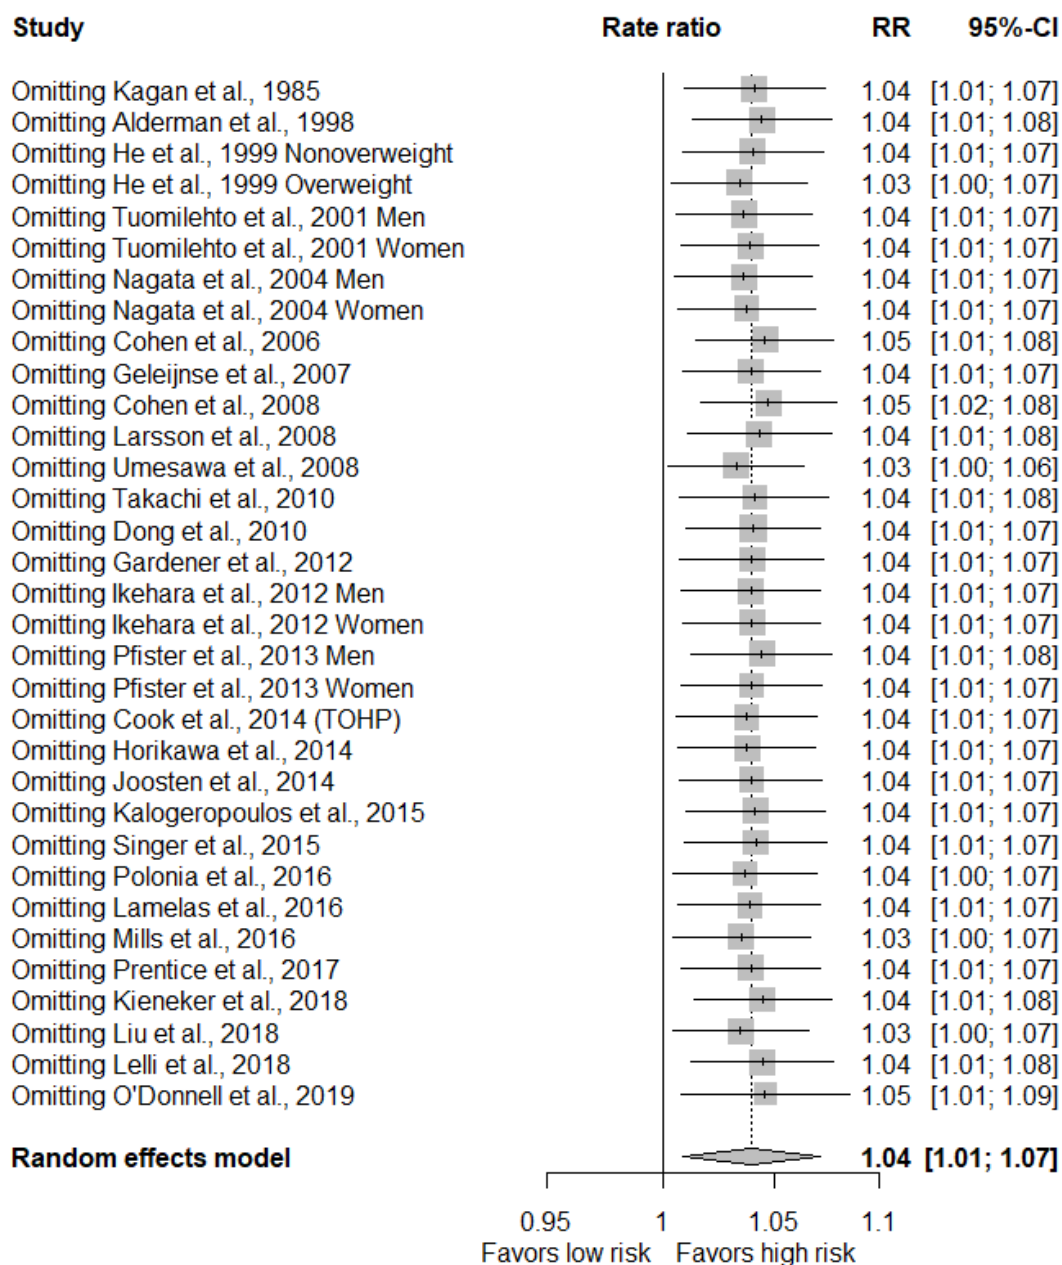

a: Total cardiovascular disease: The total cardiovascular disease included total CVD, CVD mortality, stroke, coronary heart disease, myocardial infarction and heart failure.

Figure S3. Funnel plot of total cardiovascular disease<sup>a</sup> for coefficients of dietary sodium intake in 28 studies of  $\beta$ -coefficients type.

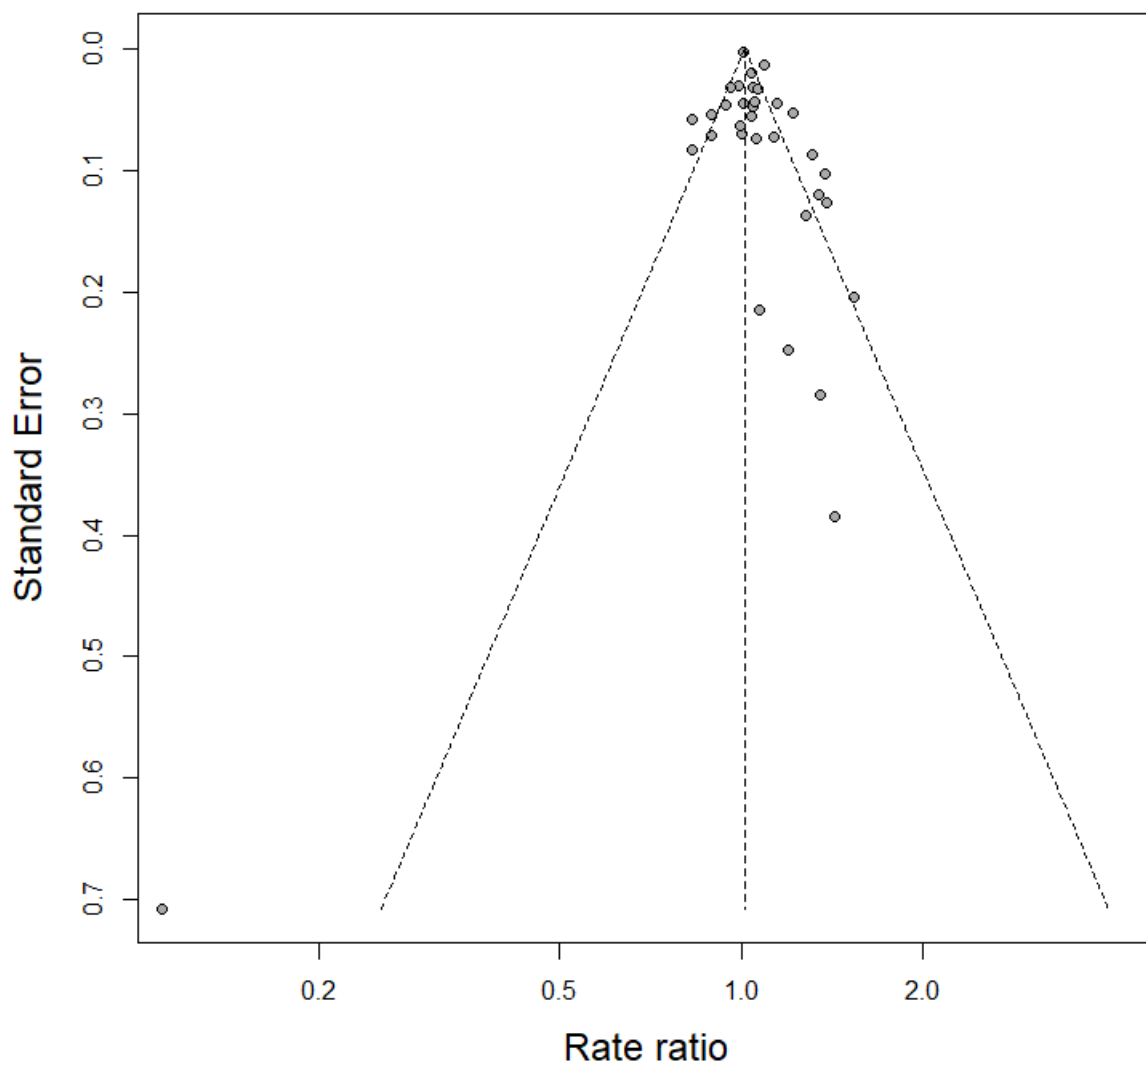

Egger test, slope= 0.01, p = 0.11

a:Total cardiovascular disease:The total cardiovascular disease included total CVD, CVD mortality, stroke, coronary heart disease, myocardial infarction and heart failure.



Figure S4. Funnel plot of total cardiovascular disease for highest versus lowest categories of dietary sodium intake in 24 studies of highest versus lowest type.

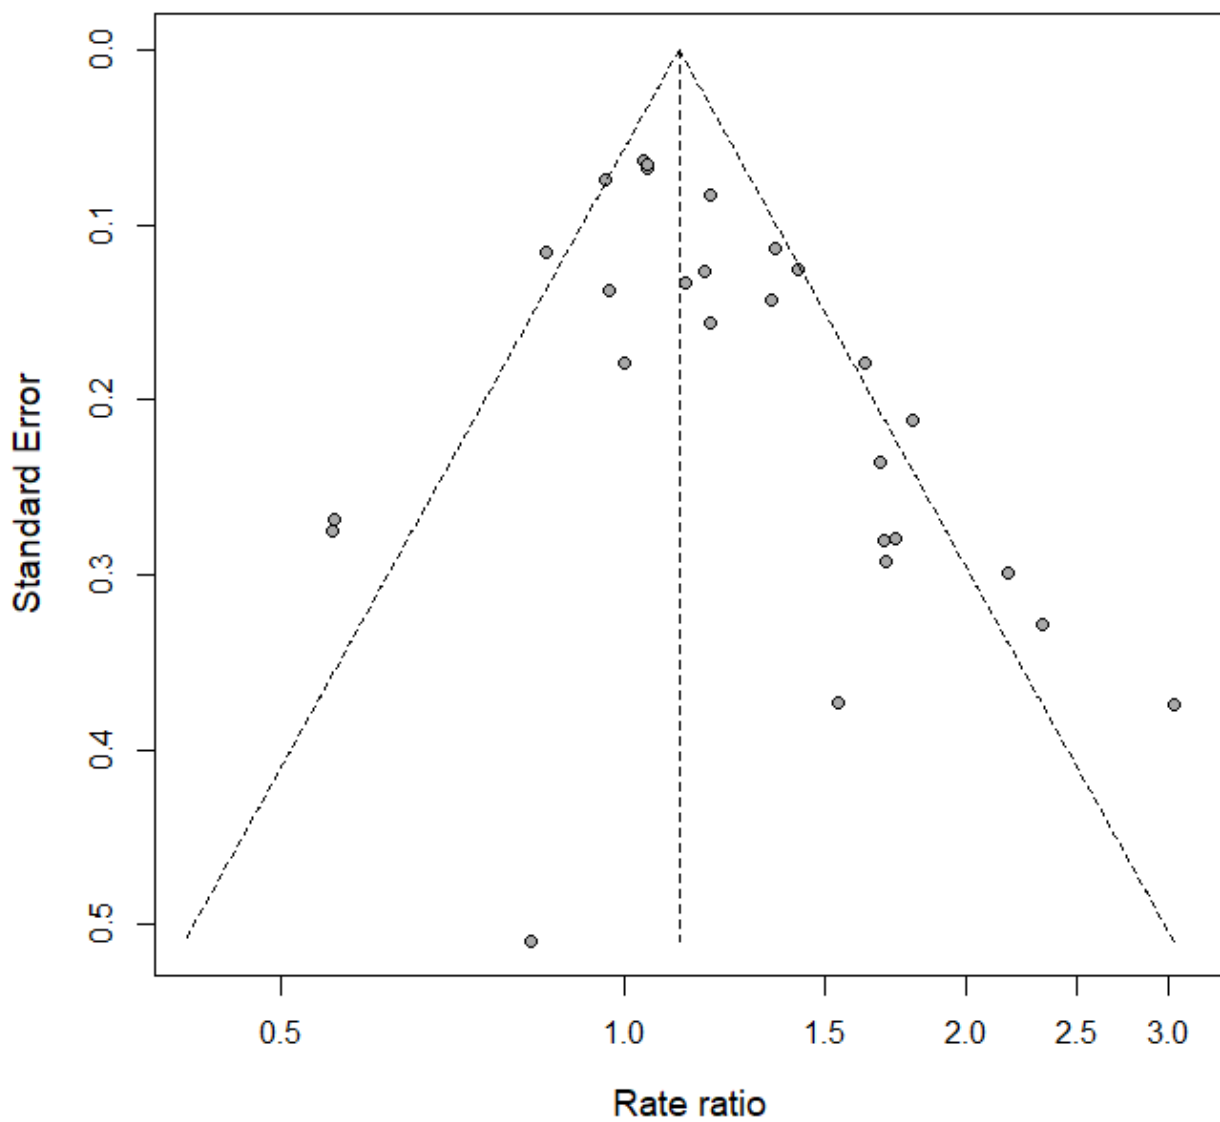

**Table S1. Characteristics of the studies included in the systematic review.**

| Study                    | Region, follow-up duration, mean age and women proportion of participants                                              | No. of case/total of person-years (PY) or numbers (N)                                                                                                      | Sodium intake (24-hour) and assessment                                                                                             | Adjusted variables                                                                                        | Outcomes, presented with rate ratios and 95% confidence intervals                                                                                                                                                     |
|--------------------------|------------------------------------------------------------------------------------------------------------------------|------------------------------------------------------------------------------------------------------------------------------------------------------------|------------------------------------------------------------------------------------------------------------------------------------|-----------------------------------------------------------------------------------------------------------|-----------------------------------------------------------------------------------------------------------------------------------------------------------------------------------------------------------------------|
| Kagan et al., 1985[1]    | Hawaii, 10yrs f/u, 56.9 yrs, 0% W                                                                                      | 238/7895 (n/N)                                                                                                                                             | 24-hour dietary recall; Q1, Q2, Q3, Q4, Q5: ≤ 1.78/1.79, 2.39/ 2.40, 3.00 3.01, 3.86/≥ 3.87 (g)                                    | Age                                                                                                       | Stroke; Q1, Q2, Q3, Q4, Q5:1.00 (reference), 1.05 (0.79, 1.44), 0.79 (0.37, 1.21), 1.07 (0.68, 1.46), 0.95 (0.55, 1.35)                                                                                               |
| Hu et al., 1992[2]       | Taiwan, 4 yrs f/u, not reported yrs, not reported % W                                                                  | No salty food (n/PY): 71/25082, Yes salty food (n/PY): 33/6420                                                                                             | Household survey questionnaire; yes/no salty food                                                                                  | Age                                                                                                       | Stroke; 1.79 (1.18, 2.71)                                                                                                                                                                                             |
| Alderman et al., 1998[3] | USA,17-21 yrs f/u, 49.8 yrs, 60.5 % W                                                                                  | 1970/11346 (n/N)                                                                                                                                           | 24-hour dietary recall; W: Q1, Q2, Q3, Q4: 678, 1232, 1791, 3105 (mg); M: Q1, Q2, Q3, Q4: 1041, 1832, 2647, 4538 (mg)              | Age, sex, race, BMI, history of CVD, HTN, SBP                                                             | CVD mortality; 0.89 (0.77, 1.02)                                                                                                                                                                                      |
| He et al., 1999[4]       | USA, 19yrs f/u, non-overweight: Q1, Q2, Q3, Q4: 46.2, 48.3, 49.3, 48.6 yrs; 62.1, 60.5, 57.3, 58.0% W; overweight: Q1, | Non-overweight (n/PY): Q1, Q2, Q3, Q4: 95/2825, 116/28853, 110/28666, 109/27698; overweight (n/PY): Q1, Q2, Q3, Q4: 45/11920, 61/10644, 75/10037, 69/11188 | 24-hour dietary recall; Non-overweight: Q1, Q2, Q3, Q4: 50.5, 76.9, 99.1, 142.5 (mmol); overweight: 45.5, 69.4, 88.7, 129.7 (mmol) | Age, sex, race, BMI, PA, education, drinking, smoking, energy intake, SBP,TC, history of DM, diuretic use | Stroke; non-overweight: Q1, Q2, Q3, Q4:1.00 (reference)/ 1.28 (0.99, 1.67), 1.04 (0.83, 1.31), 1.18 (0.92, 1.51); overweight: Q1, Q2, Q3, Q4:1.00 (reference),1.01 (0.68, 1.49), 1.28 (0.89, 1.85), 1.63 (1.16, 2.27) |

|                            |                                                                                         |                                                                                                                                                     |                                                                                                                            |                                                                                                                                                 |                                                                                                                                                                                                                                            |                                                                            |
|----------------------------|-----------------------------------------------------------------------------------------|-----------------------------------------------------------------------------------------------------------------------------------------------------|----------------------------------------------------------------------------------------------------------------------------|-------------------------------------------------------------------------------------------------------------------------------------------------|--------------------------------------------------------------------------------------------------------------------------------------------------------------------------------------------------------------------------------------------|----------------------------------------------------------------------------|
|                            |                                                                                         |                                                                                                                                                     |                                                                                                                            |                                                                                                                                                 |                                                                                                                                                                                                                                            | Q2, Q3, Q4: 50.0,<br>51.1, 52.0, 51.3 yrs;<br>64.1, 66.5, 63.5,<br>67.3% W |
| Tuomilehto et al., 2001[5] | Finland, 8-13 yrs f/u, W: 45.4 yrs, M: 45 yrs, 51.8 % W                                 | M (n/N): 72/1173; W (n/N): 87/1263                                                                                                                  | 24-hour urinary sodium excretion; W: 154 (mmol); M: 204 (mmol)                                                             | Age, study year, BMI, smoking, HDL-C, SBP                                                                                                       | CAD; M: 1.34 (1.06, 1.70); W: 1.35 (0.77, 2.35)                                                                                                                                                                                            |                                                                            |
| He et al., 2002[6]         | USA, 19 yrs f/u, non-overweight: 48.2 yrs; 64% W; overweight: 52.2 yrs, 56% W           | Nonoverweight (n/N): Q1, Q2, Q3, Q4: 110/1190, 125/1131, 91/1351, 87/1381; overweight (n/N): Q1, Q2, Q3, Q4: 208/1401, 177/1279, 146/1239, 148/1210 | 24-hour urinary sodium excretion; non-overweight: 35.2, 63, 92.7, 164.2 (mmol); overweight: 33.7, 62.9, 92.8, 167.6 (mmol) | Age, sex, race, energy intake, education, PA, smoking, drinking, history of DM and VHD, SBP, TC, time-dependent history of CAD, K and Ca intake | Congestive heart failure; non-overweight: Q1, Q2, Q3, Q4: 1.00 (reference), 1.04 (0.81, 1.33), 0.93 (0.69, 1.26), 0.87 (0.58, 1.31); overweight: Q1, Q2, Q3, Q4: 1.00 (reference), 1.09 (0.86, 1.37), 1.05 (0.78, 1.42), 1.43 (1.07, 1.91) |                                                                            |
| Nagata et al., 2004[7]     | Japan, 7 yrs f/u, W: 53.3, 54.3, 57.8 yrs; M: Q1, Q2, Q3: 51.0, 53.2, 57.7 yrs, 54.3% W | M (n/PY): Q1, Q2, Q3: 23/30670, 40/30779, 74/29587 (PY); W (n/PY): Q1, Q2, Q3: 40/36719, 39/36874, 53/6530                                          | Food frequency questionnaire; W: Q1, Q2, Q3: 3799, 4801, 5930 (mg); M: Q1, Q2, Q3: 4070, 5209, 6613 (mg)                   | Age, energy intake, marital status, education, BMI, smoking, drinking, PA, histories of HTN and DM, protein, K and vitamin E                    | Total stroke death; M: Q1, Q2, Q3: 1.00 (reference), 1.60 (0.92, 2.80), 2.33 (1.23, 4.45); W: Q1, Q2, Q3: 1.00 (reference), 1.33 (0.80, 2.21), 1.70 (0.96, 3.02)                                                                           |                                                                            |
| Cohen et al., 2006[8]      | USA, 13.7 yrs f/u, 48 yrs, 53 % W                                                       | 541/7154 (n/N)                                                                                                                                      | 24-hour dietary recall; 2718 (mg)                                                                                          | Age, sex, race, smoking, drinking, SBP, anti-hypertensive treatment, BMI, education, PA, BMI, K and energy intake, history of DM, TC            | Total CVD; 0.89 (0.80, 0.99)                                                                                                                                                                                                               |                                                                            |

|                            |                                                                                        |                                                                                 |                                                                                                         |                                                                                                                                         |                                                                                                                                       |
|----------------------------|----------------------------------------------------------------------------------------|---------------------------------------------------------------------------------|---------------------------------------------------------------------------------------------------------|-----------------------------------------------------------------------------------------------------------------------------------------|---------------------------------------------------------------------------------------------------------------------------------------|
| Cook et al., 2007[9]       | USA, TOHP I: 10 yrs f/u, TOHP II: 15yrs f/u, 43.3 yrs, 31.2 % W                        | TOHP I (n/N) I, C:17/231, 71/938; TOHP II (n/N) I, C:32/311, 80/935             | 24-hour urinary sodium excretion; TOHP I: I, C: 154.6, 156.4 (mmol); TOHP II: I, C: 182.9, 184.5 (mmol) | Age, race, sex, weight loss intervention, baseline weight, sodium excretion                                                             | Total CVD; TOHP I: 0.48 (0.25, 0.92); TOHP II: 0.79 (0.57, 1.09)                                                                      |
| Geleijnse et al., 2007[10] | Netherlands, 5.5 yrs f/u, 69.2 yrs, 59 % W                                             | 217/1448 (n/N)                                                                  | 24-hour urinary sodium excretion; 117 (mmol)                                                            | Age, sex, BMI, smoking, drinking, education DM, diuretics use, energy, Ca and saturated fat intake, urine Cr                            | CVD mortality; 1.43 (0.67, 3.03)                                                                                                      |
| Cohen et al., 2008[11]     | USA, 8.7 yrs f/u, Q1, Q2, Q3, Q4: 51, 49, 48, 44 yrs; 76.2, 62.1, 50.2, 31.9% W        | Q1, Q2, Q3, Q4 (n/N): 159/2174, 126/2175, 103/2175, 48/2175                     | 24-hour dietary recall; Q1, Q2, Q3, Q4: 1501, 2483, 3441, 5497 (mg)                                     | Age, sex, race, education, added table salt, PA, drinking, smoking, history of DM, cancer, SBP, TC, K intake, weight, treatment for HTN | Total CVD; Q1, Q2, Q3, Q4: 1.80 (1.05, 3.08), 1.94 (1.32, 2.85), 1.48 (0.82, 2.67), 1.00 (reference)                                  |
| Larsson et al., 2008[12]   | Sweden, 13.6 yrs f/u, 50-69 yrs, 0% W                                                  | 2702/360187 (n/PY)                                                              | Food frequency questionnaire; Q1, Q2, Q3, Q4, Q5: 3909, 4438, 4810, 5212, 5848 (mg)                     | Age, supplementation group, smoking, drinking, BMI, SBP, DBP, TC, HDL-C, histories of DM, CHD, PA, energy intake                        | Cerebral infarction; Q1, Q2, Q3, Q4, Q5: 1.00 (reference), 1.08 (0.96, 1.22), 1.05 (0.93, 1.18), 0.99 (0.87, 1.13), 1.04 (0.92, 1.18) |
| Umesawa et al., 2008[13]   | Japan, 12.7 yrs f/u, Q1, Q2, Q3, Q4, Q5: 55, 56, 56, 56, 58 yrs; 45, 64, 63, 64, 67% W | Q1, Q2, Q3, Q4, Q5 (n/N): 338/11746, 344/11746, 402/11746, 463/11746, 540/11746 | Food frequency questionnaire; Q1, Q2, Q3, Q4, Q5: 50, 73, 90, 109, 135 (mmol)                           | Age, sex, BMI, smoking, drinking, history of HTN, DM, menopause, HRT, PA, walking time, education, mental stress, Ca and K intake       | CVD mortality; Q1, Q2, Q3, Q4, Q5 :1.00 (reference), 1.04 (0.89, 1.22), 1.19 (1.01, 1.39), 1.29 (1.10, 1.52), 1.42 (1.20, 1.69)       |

|                           |                                                                                                           |                                                                                                                     |                                                                                                             |                                                                                                                                                                    |                                                                                                                                                            |
|---------------------------|-----------------------------------------------------------------------------------------------------------|---------------------------------------------------------------------------------------------------------------------|-------------------------------------------------------------------------------------------------------------|--------------------------------------------------------------------------------------------------------------------------------------------------------------------|------------------------------------------------------------------------------------------------------------------------------------------------------------|
| Dong et al., 2010[14]     | China, 31.4 months f/u, 59.4 yrs, 57.7% W                                                                 | 32/305 (n/N)                                                                                                        | 3-day dietary records; 1.82 (g)                                                                             | Age, sex, BMI, DM, history of CVD, MAP, Hb, Alb, Ca, P, LDL-C, Kt/V, CCr                                                                                           | CVD mortality; 0.11 (0.03, 0.48)                                                                                                                           |
| Takachi et al., 2010[15]  | Japan, 6-9 yrs f/u, Q1, Q2, Q3, Q4, Q5: 56.1, 56.4, 56.7, 57.1, 57.9 yrs; 38.3, 48.1, 54.0, 61.1, 68.1% W | Q1, Q2, Q3, Q4, Q5 (n/N): 416/15500, 428/15500, 386/15500, 403/15500, 433/15500                                     | Food frequency questionnaire; Q1, Q2, Q3, Q4, Q5: 3084, 4005, 4709, 5503, 6844 (mg)                         | Age, sex, BMI, smoking, drinking, PA, energy, K and Ca intake                                                                                                      | Total CVD; Q1, Q2, Q3, Q4, Q5: 1.00 (reference), 1.11 (0.96, 1.29), 1.02 (0.87, 1.19), 1.10 (0.94, 1.29), 1.19 (1.01, 1.40)                                |
| Yang et al., 2011[16]     | USA, 14.8 yrs f/u, not reported yrs, 52% W                                                                | 825/170110 (n/PY)                                                                                                   | 24-hour dietary recall; Low: 2176 (mg); high: 5135 (mg)                                                     | Sex, race, education, BMI, smoking, drinking, TC, HDL-C, PA, family history of CVD, energy intake                                                                  | CVD mortality; 0.83 (0.31, 2.28)                                                                                                                           |
| Gardener et al., 2012[17] | USA, 10 yrs f/u, Q1, Q2, Q3, Q4: 69, 70, 69, 68 yrs; 64, 79, 65, 51% W                                    | Q1, Q2, Q3, Q4 (n/N): 67/3306, 157/6432, 253/11447, 138/5095                                                        | Food frequency questionnaire; Q1, Q2, Q3, Q4, Q5: 65.2, 82.6, 137.0, 304.3 (mmol)                           | Age, sex, race, education, smoking, drinking, PA, energy, protein, fat, saturated fat and carbohydrates intake, DM, hypercholesterolemia, HTN, history of CVD, BMI | Stroke, myocardial infarction or CVD mortality; Q1, Q2, Q3, Q4: 1.00 (reference), 1.35 (1.00, 1.82), 1.21 (0.87, 1.67), 1.68 (1.06, 2.67)                  |
| Ikehara et al., 2012[18]  | Japan, 16.4yrs f/u, W: Q1, Q2, Q3: 58.1, 57.3, 56.9 yrs; M: Q1, Q2, Q3: 58.5, 57.9, 55.7 yrs, 58.1% W     | M: Q1, Q2, Q3 (n/PY): 306/59903, 1117/230090, 895/214563; W: Q1, Q2, Q3 (n/PY): 415/131986, 1108/399263, 576/188299 | Self-administered questionnaire; W: Q1, Q2, Q3 (mg): 1725, 1950, 2022; M: Q1, Q2, Q3: 1878, 2083, 2051 (mg) | Age, BMI, history of DM, HTN, smoking, drinking, education, PA, walking, mental stress, fresh fish intake                                                          | CVD mortality; M: Q1, Q2, Q3: 1.00 (reference), 1.02 (0.90, 1.16), 1.05 (0.92, 1.20) W: Q1, Q2, Q3: 1.00 (reference), 0.96 (0.86, 1.08), 1.05 (0.92, 1.19) |

|                           |                                                                                                                                                                                                                                                                |                                                                                                                            |                                                                                                                                                                                                                                                                                                                     |                                                                                                                                                                                                                                                                                                                                                                                        |                                                                                                                                                                                                                              |
|---------------------------|----------------------------------------------------------------------------------------------------------------------------------------------------------------------------------------------------------------------------------------------------------------|----------------------------------------------------------------------------------------------------------------------------|---------------------------------------------------------------------------------------------------------------------------------------------------------------------------------------------------------------------------------------------------------------------------------------------------------------------|----------------------------------------------------------------------------------------------------------------------------------------------------------------------------------------------------------------------------------------------------------------------------------------------------------------------------------------------------------------------------------------|------------------------------------------------------------------------------------------------------------------------------------------------------------------------------------------------------------------------------|
| Cook et al., 2014[19]     | TOHP I: USA, 10 yrs f/u, W: Q1, Q2, Q3, Q4: 44.6, 44.7, 43.0, 42.7 yrs; M: Q1, Q2, Q3, Q4: 42.1, 42.8, 43.3, 42.7 yrs, 29% W<br>TOHP II: USA, 15 yrs f/u, W: Q1, Q2, Q3, Q4: 44.4, 43.8, 43.1, 44.0 yr; M: Q1, Q2, Q3, Q4: 42.7, 43.6, 43.6, 42.5 yrs, 32.9% W | TOHP I:Q1, Q2, Q3 (n/N): 15/1890, 48/5900, 40/4270, 23/1910<br>TOHP II: Q1, Q2, Q3 (n/N): 2/705, 13/4545, 34/5115, 18/3360 | TOHP I:24-hour urinary sodium excretion; W: Q1, Q2, Q3, Q4,Q5:1847.6, 2908.1, 4088.6, 5941.2 (mg); M: Q1, Q2, Q3, Q4: 1928.2, 3054.5, 4145.8, 5923.0 (mg)<br>TOHP II: 24-hour urinary sodium excretion; W: Q1, Q2, Q3, Q4:1965.0, 3032.8, 4034.6, 5596.7 (mg); M: Q1, Q2, Q3, Q4:1995.2 3119.5, 4200.5, 5728.8 (mg) | TOHP I:Age, sex, race, clinic, treatment assignment, education, baseline weight, drinking, smoking, PA, urine K, family history of CVD, weight changes, smoking, PA during the trial periods<br>TOHP II: Age, sex, race, clinic, treatment assignment, education, baseline weight, drinking, smoking, PA, urine K, family history of CVD, weight changes, PA, during the trial periods | TOHP I:Total CVD; Q1, Q2, Q3, Q4: 0.68 (0.34, 1.37), 0.75 (0.50, 1.11), 1.00 (reference), 1.05 (0.68, 1.62)<br>TOHP II: Total CVD; Q1, Q2, Q3, Q4: 0.68 (0.34, 1.37), 0.75 (0.50, 1.11), 1.00 (reference), 1.05 (0.68, 1.62) |
| Horikawa et al., 2014[20] | Japan, 8yrs f/u, Q1, Q2, Q3, Q4: 58.1, 58.6, 59.0, 59.1 yrs; 49.6, 51.4, 47.2, 42.0% W                                                                                                                                                                         | Q1, Q2, Q3, Q4 (n/N):23/354, 36/350, 32/351, 41/359                                                                        | Food frequency questionnaire; Q1, Q2, Q3, Q4: 3.3, 3.8, 4.4, 4.6 (g)                                                                                                                                                                                                                                                | Age, sex, BMI, HbA1c, DM duration, LDL-C, HDL-C, TG, insulin, lipid-lowering agents, smoking, drinking, energy intake, PA, SBP, antihypertensive agents                                                                                                                                                                                                                                | Total CVD; Q1, Q2, Q3, Q4: 1.00 (reference), 1.73 (1.00, 3.00), 1.58 (0.88, 2.84), 2.17 (1.21, 3.90)                                                                                                                         |
| Joosten et al., 2014[21]  | Netherlands, 10.5yrs f/u, Q1, Q2, Q3, Q4: 44.6, 44.7, 43.0, 42.7 yrs; M: Q1, Q2, Q3, Q4: 42.1, 42.8, 43.3, 42.7 yrs, 29% W                                                                                                                                     | Q1, Q2, Q3, Q4 (n/PY): 123/17638, 111/17975, 112/17878, 106/18000                                                          | 24-hour urinary sodium excretion; W : Q1, Q2, Q3, Q4: <95, 95, 121, 122,                                                                                                                                                                                                                                            | Age, sex, BMI, smoking, drinking, family history of                                                                                                                                                                                                                                                                                                                                    | CHD; Q1, Q2, Q3, Q4: 1.00 (reference), 0.99 (0.76, 1.29), 1.09 (0.83, 1.44), 1.19 (0.88, 1.62)                                                                                                                               |

|                                          |                                                                                                                                                                             |                                                                                                                                                                          |                                                                                                                                                                   |                                                                                                                                                  |                                                                                                                                                                                                                                                                              |
|------------------------------------------|-----------------------------------------------------------------------------------------------------------------------------------------------------------------------------|--------------------------------------------------------------------------------------------------------------------------------------------------------------------------|-------------------------------------------------------------------------------------------------------------------------------------------------------------------|--------------------------------------------------------------------------------------------------------------------------------------------------|------------------------------------------------------------------------------------------------------------------------------------------------------------------------------------------------------------------------------------------------------------------------------|
|                                          | Q3, Q4: 50, 49, 48,<br>47 yrs, 51.3% W                                                                                                                                      |                                                                                                                                                                          | 151, >151 (mg); M: Q1,<br>Q2, Q3, Q4: <122, 122,<br>154,155, 190, >190 (mg)                                                                                       | CHD, DM, TC/HDL-C, urine<br>Mg, K, Cr                                                                                                            |                                                                                                                                                                                                                                                                              |
| O'donnell<br>et al.,<br>2014[22]         | 17 countries <sup>a</sup> , 3.7<br>yrs f/u, 51 yrs,<br>57.5% W                                                                                                              | Q1, Q2, Q3, Q4, Q5 (n/N):<br>462/10810, 662/21131,<br>1437/46663, 391/12324, 365/11017                                                                                   | 24-hour urinary sodium<br>excretion; Q1, Q2, Q3,<br>Q4, Q5: 2.44, 3.54, 4.93,<br>6.45, 8.31 (g)                                                                   | Age, sex, education,<br>smoking, drinking, DM, BMI,<br>PA, use of CVD agents,<br>history of CVD, TB, cancer,<br>HIV                              | Death or total CVD; Q1, Q2, Q3,<br>Q4, Q5:1.24 (1.07, 1.42), 1.00<br>(0.91, 1.10), 1.00 (reference), 1.06<br>(0.95, 1.19), 1.14 (1.01, 1.29)                                                                                                                                 |
| Pfister et<br>al.,<br>2014[23]           | United Kingdom,<br>12.9yrs f/u, W: Q1,<br>Q2, Q3, Q4, Q5:<br>58.9, 57.5, 57.2, 57.2,<br>67.8 yrs; M: Q1, Q2,<br>Q3, Q4, Q5: 59.4,<br>58.5, 58.2, 57.5, 58.1<br>yrs, 54.6% W | M: Q1, Q2, Q3, Q4, Q5 (n/N):<br>167/1803, 131/1803, 127/1804,<br>127/1803, 150/1804; W: Q1, Q2,<br>Q3, Q4, Q5 (n/N): 112/2168,<br>92/2168, 82/2168, 90/2168,<br>132/2168 | Single spot urine<br>sodium excretion; W:<br>Q1, Q2, Q3, Q4, Q5:101,<br>133, 154, 175, 216<br>(mmol); M: Q1, Q2, Q3,<br>Q4, Q5: 115, 145, 163,<br>182, 218 (mmol) | Age, BMI, DM, TC, social<br>class, education, smoking,<br>drinking, PA, BP                                                                       | Heart failure; M: Q1, Q2, Q3,<br>Q4, Q5: 1.24 (0.98, 1.56), 1.00<br>(reference), 0.97 (0.76, 1.24), 0.98<br>(0.77, 1.26), 1.06 (0.84, 1.35); W:<br>Q1, Q2, Q3, Q4, Q5: 1.11 (0.84,<br>1.46), 1.00 (reference), 0.88 (0.65,<br>1.18), 0.93 (0.70, 1.25), 1.26 (0.96,<br>1.65) |
| Kalogero<br>pouloset<br>al.,<br>2015[24] | USA, 10 yrs f/u,<br>73.6 yrs, 51.2% W                                                                                                                                       | Q1, Q2, Q3 (n/PY): 63/ 217, 161/<br>576, 348/1188                                                                                                                        | Food frequency<br>questionnaire;Q1, Q2,<br>Q3: <1500, 1500, 2300,<br>>2300 (mg)                                                                                   | Age, sex, race, HTN, BMI,<br>smoking, PA, history of<br>CVD, pulmonary disease,<br>DM, depression, BP, HR,<br>EKG, serum glucose, Alb, Cr,<br>TC | Total CVD; Q1, Q2, Q3: 1.05<br>(0.79, 1.41), 1.00 (reference), 1.02<br>(0.84, 1.24)                                                                                                                                                                                          |
| Singer et<br>al.,<br>2015[25]            | USA, 6.5yrs f/u, Q1,<br>Q2, Q3, Q4: 53.7,<br>53.1, 51.5, 51.0 yrs;                                                                                                          | Q1, Q2, Q3, Q4 (n/N): 128/890,<br>97/876, 96/865, 78/874                                                                                                                 | 24-hour urinary sodium<br>excretion; Q1, Q2, Q3,                                                                                                                  | Age, sex, race, BMI, SBP,<br>eGFR, urine K, hematocrit,<br>PRA,                                                                                  | CVD mortality; Q1, Q2, Q3, Q4:<br>1.00 (0.71, 1.42), 0.96 (0.68, 1.36),<br>1.06 (0.75, 1.49), 1.00 (reference)                                                                                                                                                               |

|                                |                                                                                                     |                                                                                             |                                                                                                                      |                                                                                                                                                                                                                                                                               |                                                                                                                                                                |
|--------------------------------|-----------------------------------------------------------------------------------------------------|---------------------------------------------------------------------------------------------|----------------------------------------------------------------------------------------------------------------------|-------------------------------------------------------------------------------------------------------------------------------------------------------------------------------------------------------------------------------------------------------------------------------|----------------------------------------------------------------------------------------------------------------------------------------------------------------|
|                                | 36.6, 35.3, 36.2,<br>36.0% W                                                                        |                                                                                             | Q4: 55, 102, 143, 221<br>(mmol)                                                                                      | DM, smoking, history of<br>baseline LVH                                                                                                                                                                                                                                       |                                                                                                                                                                |
| Lamelas<br>et al.,<br>2016[26] | USA, 4.7 yrs f/u,<br>51.5 yrs, 59.7 % W                                                             | Q1, Q2, Q3, Q4, Q5, Q6 (n/N):<br>50/1638, 115/3885, 161/4758,<br>110/3457, 73/1748, 59/1063 | 24-hour urinary sodium<br>excretion; Q1, Q2, Q3,<br>Q4, Q5, Q6: <3, 3, 3.99, 4,<br>4.99, 5, 5.99, 6, 6.99, >7<br>(g) | Age, sex, BMI, smoking,<br>drinking, DM, education,<br>history of CVD, country,<br>LDL-C/HDL-C, energy, fruit<br>and vegetable intake, SBP,<br>history of HTN,<br>antihypertensive agents                                                                                     | Total CVD; Q1, Q2, Q3, Q4, Q5,<br>Q6: 1.14 (0.73, 1.78), 1.14 (0.82,<br>1.59), 1.05 (0.77, 1.43), 1.00<br>(reference), 1.46 (0.95, 2.26), 1.93<br>(1.20, 3.09) |
| Mills et<br>al.,<br>2016[27]   | USA, 6.8 yrs f/u,<br>Q1, Q2, Q3, Q4:<br>57.2, 57.7, 58.2, 58.0<br>yrs; 65.0, 50.1, 38.7,<br>24.0% W | Q1, Q2, Q3, Q4 (n/PY): 174/5804,<br>159/5972, 198/5739, 273/5012                            | 24-hour urinary sodium<br>excretion; Q1, Q2, Q3,<br>Q4: 2491, 3364, 4008,<br>4941 (mg)                               | Age, sex, race, clinic site,<br>education, WC, lean BMI,<br>BMI, smoking, drinking, PA;<br>LDL-C, glucose, history of<br>CVD, use of antidiabetic<br>agents, lipid-lowering<br>agents, diuretics, RAS<br>blockades, antihypertensive<br>agents, urinary Cr excretion,<br>eGFR | Total CVD; Q1, Q2, Q3, Q4: 1.00<br>(reference), 0.87 (0.69, 1.10), 1.01<br>(0.81, 1.26), 1.36 (1.09, 1.70)                                                     |
| Polonia et<br>al.,<br>2016[28] | Portugal, 7.2 yrs<br>f/u, 54.1 yrs, 56.3%<br>W                                                      | 122/608 (n/N)                                                                               | 24-hour urinary sodium<br>excretion; Low, high:<br>198, 260 (mmol)                                                   | Age, night-time SBP                                                                                                                                                                                                                                                           | Total CVD; 1.09 (1.06, 1.12)                                                                                                                                   |
| Olde<br>Engberin               | Neatherlands, 16.2<br>yrs f/u, 47 yrs, 54%<br>W                                                     | 406/547 (n/N)                                                                               | 24-hour urinary sodium<br>excretion; Q1, Q2, Q3:<br>2.3, 3.6, 5.8 (g)                                                | Age, sex, race, eGFR, history<br>of DM, kidney disease, CVD,<br>HTN, smoking, 24-hour                                                                                                                                                                                         | Total CVD; 1.73 (1.00, 2.99)                                                                                                                                   |



|                              |                                                                        |                                                                             |                                                                                     |                                                                                                                                                     |                                                                                                                          |
|------------------------------|------------------------------------------------------------------------|-----------------------------------------------------------------------------|-------------------------------------------------------------------------------------|-----------------------------------------------------------------------------------------------------------------------------------------------------|--------------------------------------------------------------------------------------------------------------------------|
| k et al.,<br>2017[29]        |                                                                        |                                                                             |                                                                                     | urine K, urine Cr, number of antihypertensive agents, the use of RAS blockades                                                                      |                                                                                                                          |
| Prentice et al.,<br>2017[30] | USA, 12 yrs f/u, 70.9 yrs, 100% W                                      | 3383/86444 (n/N)                                                            | 24-hour urinary sodium excretion; 2566.6 (mg)                                       | Age, race, education, family history of premature CVD, smoking, DM, statin, aspirin use, HRT, PA                                                    | Total CVD; 1.06 (0.92, 1.23)                                                                                             |
| Kieneker et al.,<br>2018[31] | Netherlands, 12.5 yrs f/u, 49.2 yrs, 51.4% W                           | Q1, Q2, Q3, Q4, Q5 (n/PY): 57/16272, 49/16515, 33/16774, 25/16720, 19/16908 | 24-hour urinary sodium excretion; Q1, Q2, Q3, Q4, Q5: 83, 110, 132, 159, 209 (mmol) | Age, sex, height, weight, race, smoking, drinking, education, DM, TC/HDL-C, urine K, Mg, Cr, Alb, eGFR                                              | Stroke; Q1, Q2, Q3, Q4, Q5: 1.45 (0.92, 2.29), 1.13 (0.71, 1.79), 1.00 (reference), 1.04 (0.64, 1.71), 0.81 (0.46, 1.41) |
| Lelli et al.,<br>2018[32]    | Italy, 9 yrs f/u, 74.5 yrs, 55.4% W                                    | 169/7009 (n/PY)                                                             | 24-hour urinary sodium excretion; Q1, Q2, Q3: 3.70, 5.55, 7.04 (g)                  | Age, sex, education, CKD-EPI, SBP, HTN, DM, BMI, energy intake, BW, antihypertensive agents, diuretics use                                          | Total CVD; 0.96 (0.90, 1.02)                                                                                             |
| Liu et al.,<br>2018[33]      | USA, 18.6yrs f/u, Q1,Q2,Q3: 46.2, 46.7, 46.4 yrs; 55.7, 52.2, 47.7 % W | Q1, Q2, Q3 (n/PY): 12/5430, 23/5395, 46/5255                                | 24-hour dietary recall; Q1, Q2, Q3: 35.1, 54.5, 84.1 (mmol/8-hour)                  | Age, sex, area, work, smoking, drinking, TC, FBG, BMI, region, education, PA, percentage of energy from saturated fat, SBP, antihypertensive agents | Total CVD; Q1, Q2, Q3: 1.00 (reference), 1.66 (0.79, 3.47), 3.04 (1.46, 6.34)                                            |
| Mente et al.,<br>2018[34]    | 18 countries <sup>b</sup> , 8.1 yrs f/u, 50 yrs, 57.9% W               | 3543/95767 (n/N)                                                            | 24-hour urinary sodium excretion; Q1, Q2, Q3: 4.04, 4.70, 5.75 (g)                  | Age, sex, BMI, education, drinking, smoking, DM, country, PA, anti-                                                                                 | Total CVD; Q1, Q2, Q3: -1.00 (-2.00, 0.01), 0.24 (-2.12, 2.61), 0.37 (-0.03, 0.78)                                       |

|                            |                                                         |                                                                                                   |                                                                                                          | hypertensive agents, statin use                                                                          | (Change in event rates for specific outcomes per 1000 years for each 1 gram increase in sodium intake)                                             |
|----------------------------|---------------------------------------------------------|---------------------------------------------------------------------------------------------------|----------------------------------------------------------------------------------------------------------|----------------------------------------------------------------------------------------------------------|----------------------------------------------------------------------------------------------------------------------------------------------------|
| Kondo et al., 2019[35]     | Japan, 29 yrs f/u, 50 yrs, 56.1% W                      | Low, high (n/PY): 57/10350, 1013/213420                                                           | 3-day dietary records; Low: M: <8 (g), W <7 (g); high: M ≥8, W ≥7(g)                                     | Age, sex, smoking, drinking, energy intake                                                               | CVD mortality; 1.35 (1.02, 1.79)                                                                                                                   |
| O'Donnell et al., 2019[36] | 18 countries <sup>b</sup> , 29 yrs f/u, 51 yrs, 57.2% W | Q1, Q2, Q3, Q4, Q5, Q6 (n/N): 949/11002, 1562/21417, 1816/26012, 1640/21093, 964/12458, 953/11218 | 24-hour urinary sodium excretion; Q1, Q2, Q3, Q4, Q5, Q6 ≤3, 3, 3.99, 4, 4.99, 5, 5.99, 6, 6.99, ≥7 (g): | Age, sex, education, drinking, smoking, DM, BMI, PA, history of CVD, cancer, TB, CVD agents, cancer, HIV | Total CVD; Q1, Q2, Q3, Q4, Q5, Q6: 1.16 (1.03, 1.31), 1.04 (0.94, 1.15), 1.00 (reference), 1.08 (0.98, 1.19), 1.06 (0.95, 1.18), 1.12 (0.99, 1.25) |

Abbreviations: AER, albumin excretion rate; Alb, albumin; BMI, body mass index; BP, blood pressure; BW, body weight; C, control; Ca, calcium; CAD, coronary artery disease; CCR, creatinine clearance rate; CHD, Coronary Heart Disease; CKD-EPI, chronic kidney disease epidemiology collaboration; Cr, creatinine; CVD, cardiovascular disease; DBP, diastolic blood pressure; DM, diabetes mellitus; eGFR, estimated glomerular filtration rate; EKG, electrocardiogram; FBG, fasting blood glucose; f/u, follow up; Hb, hemoglobin; HbA1c, glycated hemoglobin; HDL-C, high-density lipoprotein-cholesterol; HIV, Human immunodeficiency virus; HR, heart rate; HRT, hormone replacement therapy; HTN, hypertension; I, intervention; K, potassium; Kt/V, a number used to quantify hemodialysis and peritoneal dialysis treatment adequacy; LDL-C, low-density lipoprotein-cholesterol; LDL-C/HDL-C, low-density lipoprotein-cholesterol to high-density lipoprotein-cholesterol ratio; LVH, left ventricular hypertrophy; M, men; Map, mean arterial pressure; Mg, magnesium; N, numbers; P, phosphate; PA, physical activity; PRA, plasma renin activity; PY, person-years; RAS, renin-angiotensin system; SBP, systolic blood pressure; TB, tuberculosis; TC, cholesterol; TC/HDL-C, total cholesterol to high-density lipoprotein-cholesterol ratio; TG, triglycerides; VHD, valvular heart disease; W, Women; WC, waist circumference

a: Argentina, Bangladesh, Brazil, Canada, Chile, China, Colombia, India, Iran, Malaysia, Pakistan, Poland, South Africa, Sweden, Turkey, United Arab Emirates, and Zimbabwe

b: Argentina, Bangladesh, Brazil, Canada, Chile, China, Colombia, India, Iran, Malaysia, Pakistan, Palestinian territories occupied by Israel, Poland, South

Africa, Sweden, Turkey, United Arab Emirates and Zimbabwe

**Table S2. Newcastle–Ottawa scale for assessment of quality of included cohort studies.**

| Study                      | Selection                                                                                                       |                                                 |                                              |                                                              | Comparability                                                                         |                              | Outcome                                              |                     |                                                                                                        | Final score |
|----------------------------|-----------------------------------------------------------------------------------------------------------------|-------------------------------------------------|----------------------------------------------|--------------------------------------------------------------|---------------------------------------------------------------------------------------|------------------------------|------------------------------------------------------|---------------------|--------------------------------------------------------------------------------------------------------|-------------|
|                            | Representativeness of the exposure                                                                              | Selection of the non-exposed                    | Ascertainment of exposure                    | Outcome not present at start                                 | Main factor                                                                           | Additonal factor             | Assessment                                           | Follow-up length    | Adequacy of follow-up                                                                                  |             |
| Acceptable (★)             | a. Representative of general adult population in community<br>b. Somewhat representative (being at risk of CVD) | Drawn from the same community as exposed cohort | a. Secure records<br>b. Structured interview | a. Outcome not present at start<br>b. Excluded when analysis | a. At least for age and sex<br>b. Adjusted age and stratified by sex<br>c. Single sex | Adjusted any other variables | a. Independent blind assessment<br>b. Record linkage | Follow-up > 5 years | a. Follow-up completed<br>b. Small subjects lost (<20%)<br>c. Lost subjects unlikely to introduce bias |             |
| Kagan et al., 1985[1]      | ★ <sup>a</sup>                                                                                                  | ★                                               | ★ <sup>b</sup>                               | ★ <sup>a</sup>                                               | ★ <sup>c</sup>                                                                        | -                            | ★ <sup>b</sup>                                       | ★                   | ★ <sup>c</sup>                                                                                         | 8           |
| Hu et al., 1992[2]         | ★ <sup>a</sup>                                                                                                  | ★                                               | -                                            | ★ <sup>a</sup>                                               | -                                                                                     | -                            | ★ <sup>a</sup>                                       | -                   | ★ <sup>c</sup>                                                                                         | 5           |
| Alderman et al., 1998[3]   | ★ <sup>a</sup>                                                                                                  | ★                                               | ★ <sup>b</sup>                               | -                                                            | ★ <sup>a</sup>                                                                        | ★                            | ★ <sup>b</sup>                                       | ★                   | ★ <sup>b</sup>                                                                                         | 8           |
| He et al., 1999[4]         | ★ <sup>a</sup>                                                                                                  | ★                                               | ★ <sup>b</sup>                               | ★ <sup>a</sup>                                               | ★ <sup>a</sup>                                                                        | ★                            | ★ <sup>b</sup>                                       | ★                   | -                                                                                                      | 8           |
| Tuomilehto et al., 2001[5] | ★ <sup>a</sup>                                                                                                  | ★                                               | ★ <sup>a</sup>                               | ★ <sup>b</sup>                                               | ★ <sup>b</sup>                                                                        | ★                            | ★ <sup>b</sup>                                       | ★                   | ★ <sup>c</sup>                                                                                         | 9           |
| He et al., 2002[6]         | ★ <sup>a</sup>                                                                                                  | ★                                               | ★ <sup>b</sup>                               | -                                                            | ★ <sup>a</sup>                                                                        | ★                            | ★ <sup>b</sup>                                       | ★                   | ★ <sup>b</sup>                                                                                         | 8           |
| Nagata et al., 2004[7]     | ★ <sup>a</sup>                                                                                                  | ★                                               | ★ <sup>b</sup>                               | ★ <sup>b</sup>                                               | ★ <sup>b</sup>                                                                        | ★                            | ★ <sup>b</sup>                                       | ★                   | ★ <sup>c</sup>                                                                                         | 9           |
| Cohen et al., 2006[8]      | ★ <sup>a</sup>                                                                                                  | ★                                               | ★ <sup>b</sup>                               | ★ <sup>a</sup>                                               | ★ <sup>a</sup>                                                                        | ★                            | ★ <sup>b</sup>                                       | ★                   | ★ <sup>c</sup>                                                                                         | 9           |
| Cook et al., 2007[9]       | ★ <sup>b</sup>                                                                                                  | ★                                               | ★ <sup>a</sup>                               | ★ <sup>b</sup>                                               | ★ <sup>a</sup>                                                                        | ★                            | ★ <sup>b</sup>                                       | ★                   | ★ <sup>b</sup>                                                                                         | 9           |
| Geleijnse et al., 2007[10] | ★ <sup>a</sup>                                                                                                  | ★                                               | ★ <sup>a</sup>                               | ★ <sup>b</sup>                                               | ★ <sup>a</sup>                                                                        | ★                            | ★ <sup>a</sup>                                       | ★                   | ★ <sup>b</sup>                                                                                         | 9           |

|                                    |                |   |                |                |                |   |                |   |                |   |
|------------------------------------|----------------|---|----------------|----------------|----------------|---|----------------|---|----------------|---|
| Cohen et al., 2008[11]             | ★ <sup>a</sup> | ★ | ★ <sup>b</sup> | ★ <sup>a</sup> | ★ <sup>a</sup> | ★ | ★ <sup>b</sup> | ★ | ★ <sup>c</sup> | 9 |
| Larsson et al., 2008[12]           | ★ <sup>b</sup> | ★ | ★ <sup>b</sup> | -              | ★ <sup>c</sup> | ★ | ★ <sup>b</sup> | ★ | ★ <sup>b</sup> | 8 |
| Umesawa et al., 2008[13]           | ★ <sup>a</sup> | ★ | ★ <sup>b</sup> | ★ <sup>a</sup> | ★ <sup>a</sup> | ★ | ★ <sup>b</sup> | ★ | ★ <sup>c</sup> | 9 |
| Dong et al., 2010[14]              | -              | ★ | ★ <sup>b</sup> | -              | ★ <sup>a</sup> | ★ | ★ <sup>b</sup> | - | ★ <sup>c</sup> | 6 |
| Takachi et al., 2010[15]           | ★ <sup>a</sup> | ★ | ★ <sup>b</sup> | ★ <sup>b</sup> | ★ <sup>a</sup> | ★ | ★ <sup>b</sup> | ★ | ★ <sup>b</sup> | 9 |
| Yang et al., 2011[16]              | ★ <sup>a</sup> | ★ | ★ <sup>b</sup> | ★ <sup>a</sup> | -              | ★ | ★ <sup>b</sup> | ★ | ★ <sup>c</sup> | 8 |
| Gardener et al., 2012[17]          | ★ <sup>a</sup> | ★ | ★ <sup>b</sup> | -              | ★ <sup>a</sup> | ★ | ★ <sup>b</sup> | ★ | ★ <sup>c</sup> | 8 |
| Ikehara et al., 2012[18]           | ★ <sup>a</sup> | ★ | -              | ★ <sup>b</sup> | ★ <sup>b</sup> | ★ | ★ <sup>b</sup> | ★ | -              | 7 |
| Cook et al., 2014[19]              | ★ <sup>a</sup> | ★ | ★ <sup>a</sup> | -              | ★              | ★ | ★ <sup>b</sup> | ★ | -              | 7 |
| Horikawa et al., 2014[20]          | ★ <sup>b</sup> | ★ | ★ <sup>b</sup> | ★ <sup>b</sup> | ★ <sup>a</sup> | ★ | ★ <sup>a</sup> | ★ | -              | 8 |
| Joosten et al., 2014[21]           | ★ <sup>a</sup> | ★ | ★ <sup>a</sup> | -              | ★ <sup>a</sup> | ★ | ★ <sup>b</sup> | ★ | ★ <sup>c</sup> | 8 |
| O'donnell et al., 2014[22]         | ★ <sup>a</sup> | ★ | ★ <sup>a</sup> | -              | ★ <sup>a</sup> | ★ | ★ <sup>a</sup> | - | ★ <sup>b</sup> | 7 |
| Pfister et al., 2014[23]           | ★ <sup>a</sup> | ★ | -              | ★ <sup>b</sup> | ★ <sup>b</sup> | ★ | -              | ★ | -              | 6 |
| Kalogeropouloset al.,<br>2015[24]  | ★ <sup>a</sup> | ★ | ★ <sup>b</sup> | -              | ★ <sup>a</sup> | ★ | ★ <sup>b</sup> | ★ | ★ <sup>c</sup> | 8 |
| Singer et al., 2015[25]            | ★ <sup>b</sup> | ★ | ★ <sup>a</sup> | -              | ★ <sup>a</sup> | ★ | ★ <sup>b</sup> | ★ | ★ <sup>c</sup> | 8 |
| Lamelas et al., 2016[26]           | ★ <sup>a</sup> | ★ | ★ <sup>a</sup> | -              | ★ <sup>a</sup> | ★ | ★ <sup>a</sup> | - | ★ <sup>b</sup> | 7 |
| Mills et al., 2016[27]             | ★ <sup>b</sup> | ★ | ★ <sup>a</sup> | -              | ★ <sup>a</sup> | ★ | ★ <sup>b</sup> | ★ | ★ <sup>c</sup> | 8 |
| Polonia et al., 2016[28]           | ★ <sup>b</sup> | ★ | ★ <sup>a</sup> | ★ <sup>a</sup> | -              | ★ | ★ <sup>a</sup> | ★ | -              | 7 |
| Olde Engberink et al.,<br>2017[29] | ★ <sup>a</sup> | ★ | ★ <sup>a</sup> | -              | ★ <sup>a</sup> | ★ | ★ <sup>b</sup> | ★ | -              | 7 |
| Prentice et al., 2017[30]          | ★ <sup>b</sup> | ★ | ★ <sup>a</sup> | ★ <sup>a</sup> | ★ <sup>c</sup> | ★ | ★ <sup>a</sup> | ★ | ★ <sup>b</sup> | 9 |
| Kieneker et al., 2018[31]          | ★ <sup>a</sup> | ★ | ★ <sup>a</sup> | ★ <sup>b</sup> | ★ <sup>a</sup> | ★ | ★ <sup>b</sup> | ★ | ★ <sup>c</sup> | 9 |
| Lelli et al., 2018[32]             | ★ <sup>b</sup> | ★ | ★ <sup>a</sup> | ★ <sup>a</sup> | ★ <sup>a</sup> | ★ | ★ <sup>a</sup> | ★ | -              | 8 |

|                            |                |   |                |                |                |   |                |   |                |   |
|----------------------------|----------------|---|----------------|----------------|----------------|---|----------------|---|----------------|---|
| Liu et al., 2018[33]       | ★ <sup>a</sup> | ★ | ★ <sup>b</sup> | ★ <sup>b</sup> | ★ <sup>a</sup> | ★ | ★ <sup>b</sup> | ★ | ★ <sup>b</sup> | 9 |
| Mente et al., 2018[34]     | ★ <sup>a</sup> | ★ | ★ <sup>a</sup> | -              | ★ <sup>a</sup> | ★ | ★ <sup>a</sup> | ★ | ★ <sup>b</sup> | 8 |
| Kondo et al., 2019[35]     | ★ <sup>a</sup> | ★ | ★ <sup>b</sup> | ★ <sup>b</sup> | ★ <sup>a</sup> | ★ | ★ <sup>b</sup> | ★ | ★ <sup>c</sup> | 9 |
| O'Donnell et al., 2019[36] | ★ <sup>a</sup> | ★ | ★ <sup>a</sup> | -              | ★ <sup>a</sup> | ★ | ★ <sup>b</sup> | ★ | ★ <sup>b</sup> | 8 |

Abbreviation: CVD, cardiovascular disease

### Supplemental References. References for Table S1 and Table S2.

1. Kagan, A.; Popper, J.S.; Rhoads, G.G.; Yano, K. Dietary and other risk factors for stroke in Hawaiian Japanese men. *Stroke* **1985**, *16*, 390–396, doi:10.1161/01.str.16.3.390.
2. Hu, H.H.; Sheng, W.Y.; Chu, F.L.; Lan, C.F.; Chiang, B.N. Incidence of stroke in Taiwan. *Stroke* **1992**, *23*, 1237–1241, doi:10.1161/01.str.23.9.1237.
3. Alderman, M.H.; Cohen, H.; Madhavan, S. Dietary sodium intake and mortality: The National Health and Nutrition Examination Survey (NHANES I). *Lancet* **1998**, *351*, 781–785, doi:10.1016/s0140-6736(97)09092-2.
4. He, J.; Ogden, L.G.; Vupputuri, S.; Bazzano, L.A.; Loria, C.; Whelton, P.K. Dietary sodium intake and subsequent risk of cardiovascular disease in overweight adults. *J. Am. Med. Assoc.* **1999**, *282*, 2027–2034, doi:10.1001/jama.282.21.2027.
5. Tuomilehto, J.; Jousilahti, P.; Rastenyte, D.; Moltchanov, V.; Tanskanen, A.; Pietinen, P.; Nissinen, A. Urinary sodium excretion and cardiovascular mortality in Finland: A prospective study. *Lancet* **2001**, *357*, 848–851, doi:10.1016/s0140-6736(00)04199-4.
6. He, J.; Ogden, L.G.; Bazzano, L.A.; Vupputuri, S.; Loria, C.; Whelton, P.K. Dietary sodium intake and incidence of congestive heart failure in overweight US men and women: First National Health and Nutrition Examination Survey Epidemiologic Follow-up Study. *Arch. Intern. Med.* **2002**, *162*, 1619–1624, doi:10.1001/archinte.162.14.1619.
7. Nagata, C.; Takatsuka, N.; Shimizu, N.; Shimizu, H. Sodium intake and risk of death from stroke in Japanese men and women. *Stroke* **2004**, *35*, 1543–1547, doi:10.1161/01.STR.0000130425.50441.b0.
8. Cohen, H.W.; Hailpern, S.M.; Fang, J.; Alderman, M.H. Sodium intake and mortality in the NHANES II follow-up study. *Am. J. Med.* **2006**, *119*, 275.e7–275.e14, doi:10.1016/j.amjmed.2005.10.042.
9. Cook, N.R.; Cutler, J.A.; Obarzanek, E.; Buring, J.E.; Rexrode, K.M.; Kumanyika, S.K.; Appel, L.J.; Whelton, P.K. Long term effects of dietary sodium reduction on cardiovascular disease outcomes: Observational follow-up of the trials of hypertension prevention (TOHP). *BMJ* **2007**, *334*, 885–888, doi:10.1136/bmj.39147.604896.55.
10. Geleijnse, J.M.; Witteman, J.C.M.; Stijnen, T.; Kloos, M.W.; Hofman, A.; Grobbee, D.E. Sodium and potassium intake and risk of cardiovascular events and all-cause mortality: The Rotterdam Study. *Eur. J. Epidemiol.* **2007**, *22*, 763–770, doi:10.1007/s10654-007-9186-2.
11. Cohen, H.W.; Hailpern, S.M.; Alderman, M.H. Sodium intake and mortality follow-up in the Third National Health and Nutrition Examination Survey (NHANES III). *J. Gen. Intern. Med.* **2008**, *23*, 1297–1302, doi:10.1007/s11606-008-0645-6.
12. Larsson, S.C.; Virtanen, M.J.; Mars, M.; Männistö, S.; Pietinen, P.; Albanes, D.; Virtamo, J. Magnesium, calcium, potassium, and sodium intakes and risk of stroke in male smokers. *Arch. Intern. Med.* **2008**, *168*, 459–465, doi:10.1001/archinte.168.5.459.
13. Umesawa, M.; Iso, H.; Date, C.; Yamamoto, A.; Toyoshima, H.; Watanabe, Y.; Kikuchi, S.; Koizumi, A.; Kondo, T.; Inaba, Y.; et al. Relations between dietary sodium and potassium intakes and mortality from cardiovascular disease: The Japan Collaborative Cohort study for evaluation of cancer risks. *Am. J. Clin. Nutr.* **2008**, *88*, 195–202.
14. Dong, J.; Li, Y.; Yang, Z.; Luo, J. Low dietary sodium intake increases the death risk in peritoneal dialysis. *Clin. J. Am. Soc. Nephrol.* **2010**, *5*, 240–247, doi:10.2215/cjn.05410709.
15. Takachi, R.; Inoue, M.; Shimazu, T.; Sasazuki, S.; Ishihara, J.; Sawada, N.; Yamaji, T.; Iwasaki, M.; Iso, H.; Tsubono, Y.; et al. Consumption of sodium and salted foods in relation to cancer and cardiovascular disease: The Japan public health center-based prospective study. *Am. J. Clin. Nutr.* **2010**, *91*, 456–464, doi:10.3945/ajcn.2009.28587.
16. Yang, Q.; Liu, T.; Kuklina, E.V.; Flanders, W.D.; Hong, Y.; Gillespie, C.; Chang, M.H.; Gwinn, M.; Dowling, N.; Khoury, M.J.; et al. Sodium and potassium intake and mortality among US adults: Prospective data from the Third National Health and Nutrition Examination Survey. *Arch. Intern. Med.* **2011**, *171*, 1183–1191, doi:10.1001/archinternmed.2011.257.
17. Gardener, H.; Rundek, T.; Wright, C.B.; Elkind, M.S.V.; Sacco, R.L. Dietary sodium and risk of stroke in the Northern Manhattan Study. *Stroke* **2012**, *43*, 1200–1205, doi:10.1161/STROKEAHA.111.641043.

18. Ikehara, S.; Iso, H.; Date, C.; Kikuchi, S.; Watanabe, Y.; Inaba, Y.; Tamakoshi, A. Salt preference and mortality from stroke and coronary heart disease for Japanese men and women: The JACC study. *Prev. Med.* **2012**, *54*, 32–37, doi:10.1016/j.ypmed.2011.10.013.
19. Cook, N.R.; Appel, L.J.; Whelton, P.K. Lower levels of sodium intake and reduced cardiovascular risk. *Circulation* **2014**, *129*, 981–989, doi:10.1161/circulationaha.113.006032.
20. Horikawa, C.; Yoshimura, Y.; Kamada, C.; Tanaka, S.; Tanaka, S.; Hanyu, O.; Araki, A.; Ito, H.; Tanaka, A.; Ohashi, Y.; et al. Dietary sodium intake and incidence of diabetes complications in Japanese patients with type 2 diabetes: Analysis of the Japan diabetes complications study (JDCS). *J. Clin. Endocrinol. Metab.* **2014**, *99*, 3635–3643, doi:10.1210/jc.2013-4315.
21. Joosten, M.M.; Gansevoort, R.T.; Mukamal, K.J.; Heerspink, H.J.L.; Geleijnse, J.M.; Feskens, E.J.M.; Navis, G.; Bakker, S.J.L. Sodium excretion and risk of developing coronary heart disease. *Circulation* **2014**, *129*, 1121–1128, doi:10.1161/CIRCULATIONAHA.113.004290.
22. O'Donnell, M.; Mente, A.; Rangarajan, S.; McQueen, M.J.; Wang, X.; Liu, L.; Yan, H.; Lee, S.F.; Mony, P.; Devanath, A.; et al. Urinary sodium and potassium excretion, mortality, and cardiovascular events. *N. Engl. J. Med.* **2014**, *371*, 612–623, doi:10.1056/NEJMoa1311889.
23. Pfister, R.; Michels, G.; Sharp, S.J.; Luben, R.; Wareham, N.J.; Khaw, K.T. Estimated urinary sodium excretion and risk of heart failure in men and women in the EPIC-Norfolk study. *Eur. J. Heart Fail.* **2014**, *16*, 394–402, doi:10.1002/ejhf.56.
24. Kalogeropoulos, A.P.; Georgiopoulou, V.V.; Murphy, R.A.; Newman, A.B.; Bauer, D.C.; Harris, T.B.; Yang, Z.; Applegate, W.B.; Kritchevsky, S.B. Dietary sodium content, mortality, and risk for cardiovascular events in older adults: The health, aging, and body composition (Health ABC) study. *JAMA Intern. Med.* **2015**, *175*, 410–419, doi:10.1001/jamainternmed.2014.6278.
25. Singer, P.; Cohen, H.; Alderman, M. Assessing the associations of sodium intake with long-term all-cause and cardiovascular mortality in a hypertensive cohort. *Am. J. Hypertens.* **2015**, *28*, 335–342, doi:10.1093/ajh/hpu141.
26. Lamelas, P.M.; Mente, A.; Diaz, R.; Orlandini, A.; Avezum, A.; Oliveira, G.; Lanas, F.; Seron, P.; Lopez-Jaramillo, P.; Camacho-Lopez, P.; et al. Association of urinary sodium excretion with blood pressure and cardiovascular clinical events in 17,033 Latin Americans. *Am. J. Hypertens.* **2016**, *29*, 796–805, doi:10.1093/ajh/hpv195.
27. Mills, K.T.; Chen, J.; Yang, W.; Appel, L.J.; Kusek, J.W.; Alper, A.; Delafontaine, P.; Keane, M.G.; Mohler, E.; Ojo, A.; et al. Sodium excretion and the risk of cardiovascular disease in patients with chronic kidney disease. *JAMA J. Am. Med. Assoc.* **2016**, *315*, 2200–2210, doi:10.1001/jama.2016.4447.
28. Polonia, J.; Monteiro, J.; Almeida, J.; Silva, J.A.; Bertoquini, S. High salt intake is associated with a higher risk of cardiovascular events: A 7.2-year evaluation of a cohort of hypertensive patients. *Blood Press. Monit.* **2016**, *21*, 301–306, doi:10.1097/mbp.0000000000000205.
29. Olde Engberink, R.H.G.; Van Den Hoek, T.C.; Van Noordenne, N.D.; Van Den Born, B.J.H.; Peters-Sengers, H.; Vogt, L. Use of a single baseline versus multiyear 24-hour urine collection for estimation of long-term sodium intake and associated cardiovascular and renal risk. *Circulation* **2017**, *136*, 917–926, doi:10.1161/CIRCULATIONAHA.117.029028.
30. Prentice, R.L.; Huang, Y.; Neuhaus, M.L.; Manson, J.E.; Mossavar-Rahmani, Y.; Thomas, F.; Tinker, L.F.; Allison, M.; Johnson, K.C.; Wassertheil-Smoller, S.; et al. Associations of Biomarker-Calibrated Sodium and Potassium Intakes with Cardiovascular Disease Risk among Postmenopausal Women. *Am. J. Epidemiol.* **2017**, *186*, 1035–1043, doi:10.1093/aje/kwx238.
31. Kieneker, L.M.; Eisenga, M.F.; Gansevoort, R.T.; de Boer, R.A.; Navis, G.; Dullaart, R.P.F.; Joosten, M.M.; Bakker, S.J.L. Association of Low Urinary Sodium Excretion with Increased Risk of Stroke. *Mayo Clin. Proc.* **2018**, *93*, 1803–1809, doi:10.1016/j.mayocp.2018.05.028.
32. Lelli, D.; Antonelli-Incalzi, R.; Bandinelli, S.; Ferrucci, L.; Pedone, C. Association between sodium excretion and cardiovascular disease and mortality in the elderly: A cohort study. *J. Am. Med. Dir. Assoc.* **2018**, *19*, 229–234, doi:10.1016/j.jamda.2017.09.004.



33. Liu, H.; Gao, X.; Zhou, L.; Wu, Y.; Li, Y.; Mai, J.; Nie, Z.; Wu, Y.; Liu, X.; Zhao, L. Urinary sodium excretion and risk of cardiovascular disease in the Chinese population: A prospective study. *Hypertens. Res.* **2018**, *41*, 849–855, doi:10.1038/s41440-018-0091-8.
34. Mente, A.; O'Donnell, M.; Rangarajan, S.; McQueen, M.; Dagenais, G.; Wielgosz, A.; Lear, S.; Ah, S.T.L.; Wei, L.; Diaz, R.; et al. Urinary sodium excretion, blood pressure, cardiovascular disease, and mortality: A community-level prospective epidemiological cohort study. *Lancet* **2018**, *392*, 496–506, doi:10.1016/S0140-6736(18)31376-X.
35. Kondo, K.; Miura, K.; Tanaka-Mizuno, S.; Kadota, A.; Arima, H.; Okuda, N.; Fujiyoshi, A.; Miyagawa, N.; Yoshita, K.; Okamura, T.; et al. Cardiovascular risk assessment chart by dietary factors in Japan—NIPPON DATA80. *Circ. J.* **2019**, *83*, 1254–1260, doi:10.1253/circj.CJ-18-1002.
36. O'Donnell, M.; Mente, A.; Rangarajan, S.; McQueen, M.J.; O'Leary, N.; Yin, L.; Liu, X.; Swaminathan, S.; Khatib, R.; Rosengren, A.; et al. Joint association of urinary sodium and potassium excretion with cardiovascular events and mortality: Prospective cohort study. *BMJ* **2019**, *364*, l772, doi:10.1136/bmj.l772.
